# Supplementary material for: Polymorphism and isomorphism of Huperzine A solvates: structure, properties and form transformation
Source: Royal Society of Chemistry journal article supplement (doi:10.1039/c3ce41965g), 2013-11-22
Supplement: c3ce41965g.pdf [file c3ce41965g.pdf]

## Electronic Supporting Information (ESI)

### **Polymorphism and Isomorphism of Huperzine A Solvates: Structure, Properties and Form Transformation**

Qi Zhang, Liye Lu, Wenjuan Dai and Xuefeng Mei\*

Pharmaceutical Analytical & Solid-State Chemistry Research Center, Shanghai Institute of Materia Medica,  
Chinese Academy of Sciences, Shanghai 201203, China

Tel: +86 21 50800 934. Fax: +86 21 50800934.

Corresponding author: xuefengmei@simm.ac.cn.

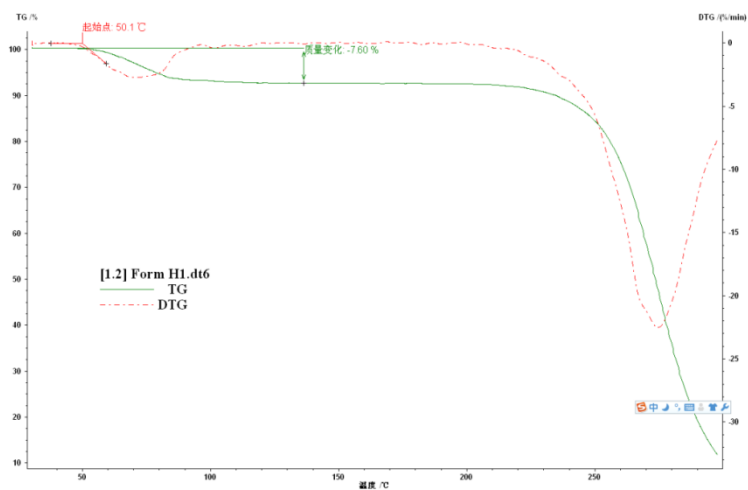

**Fig. S1** TG Diagram of Huperzine A Form H1

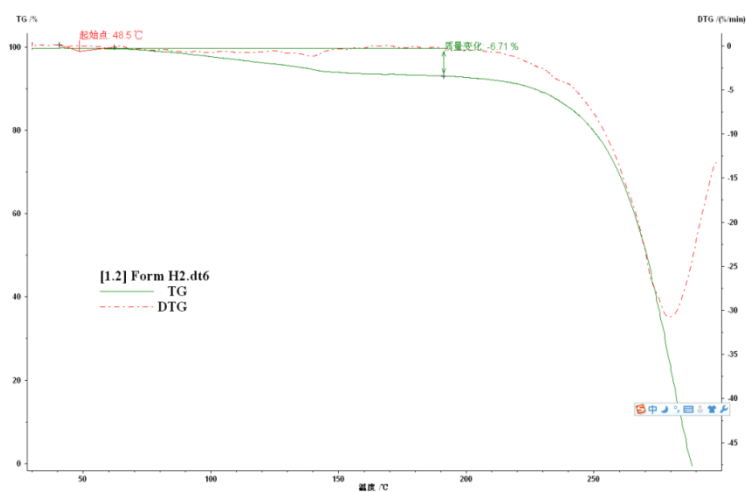

Fig. S2 TG Diagram of Huperzine A Form H2

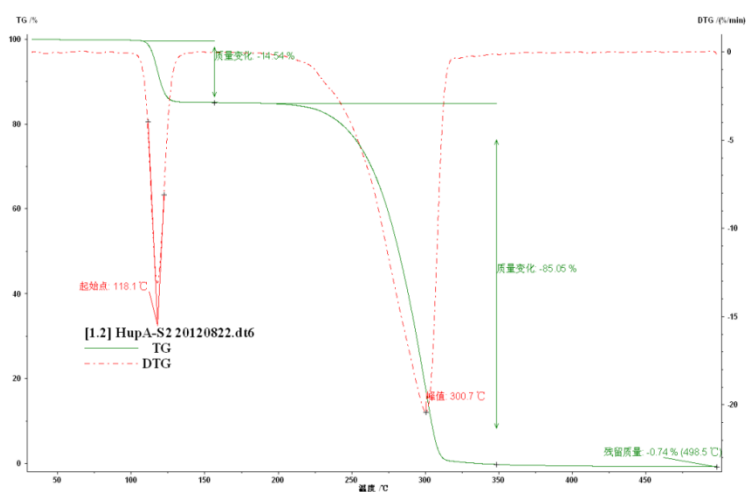

Fig. S3 TG Diagram of Huperzine A Form S1

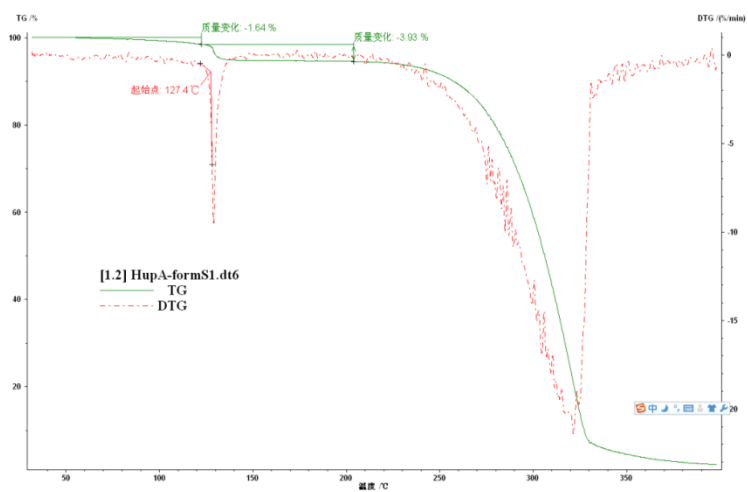

**Fig. S4** TG Diagram of Huperzine A Form S3

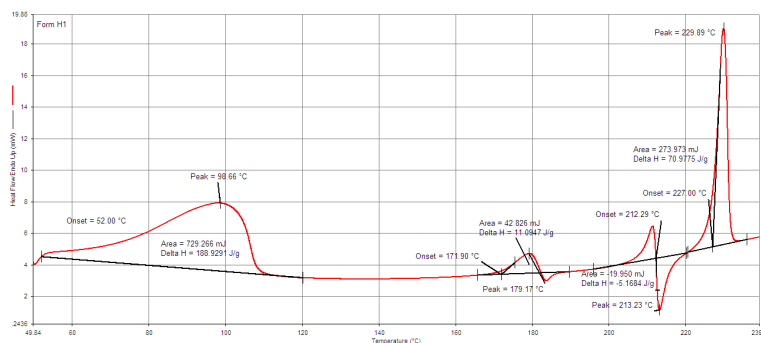

**Fig. S5** DSC Diagram of Huperzine A form H1

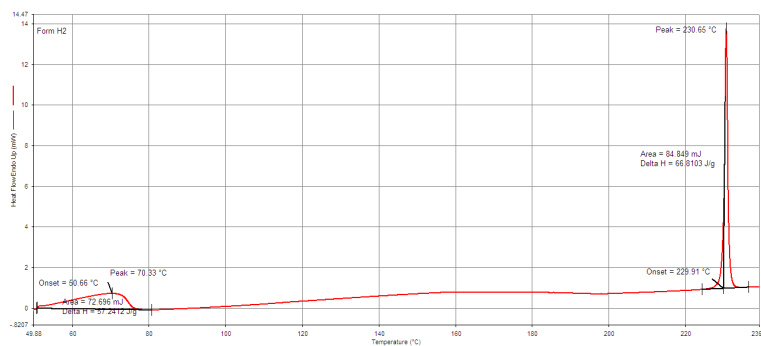

**Fig. S6** DSC Diagram of Huperzine A Form H2

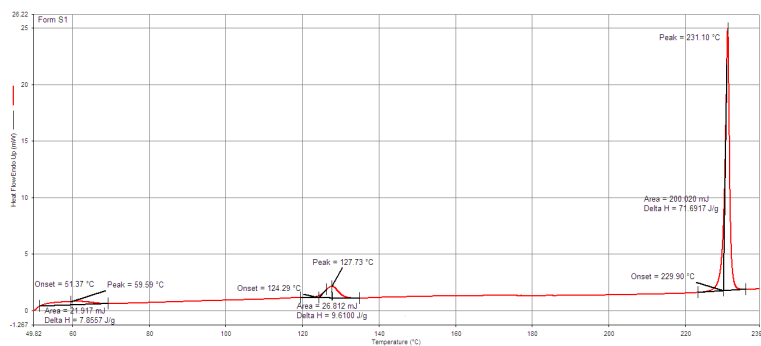

**Fig. S7** DSC Diagram of Huperzine A Form S1

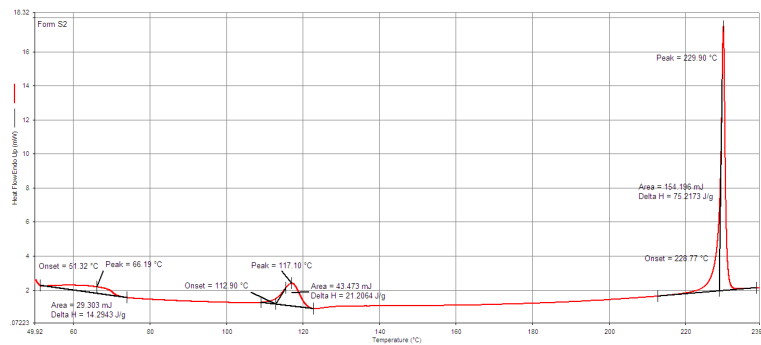

**Fig. S8** DSC Diagram of Huperzine A Form S3

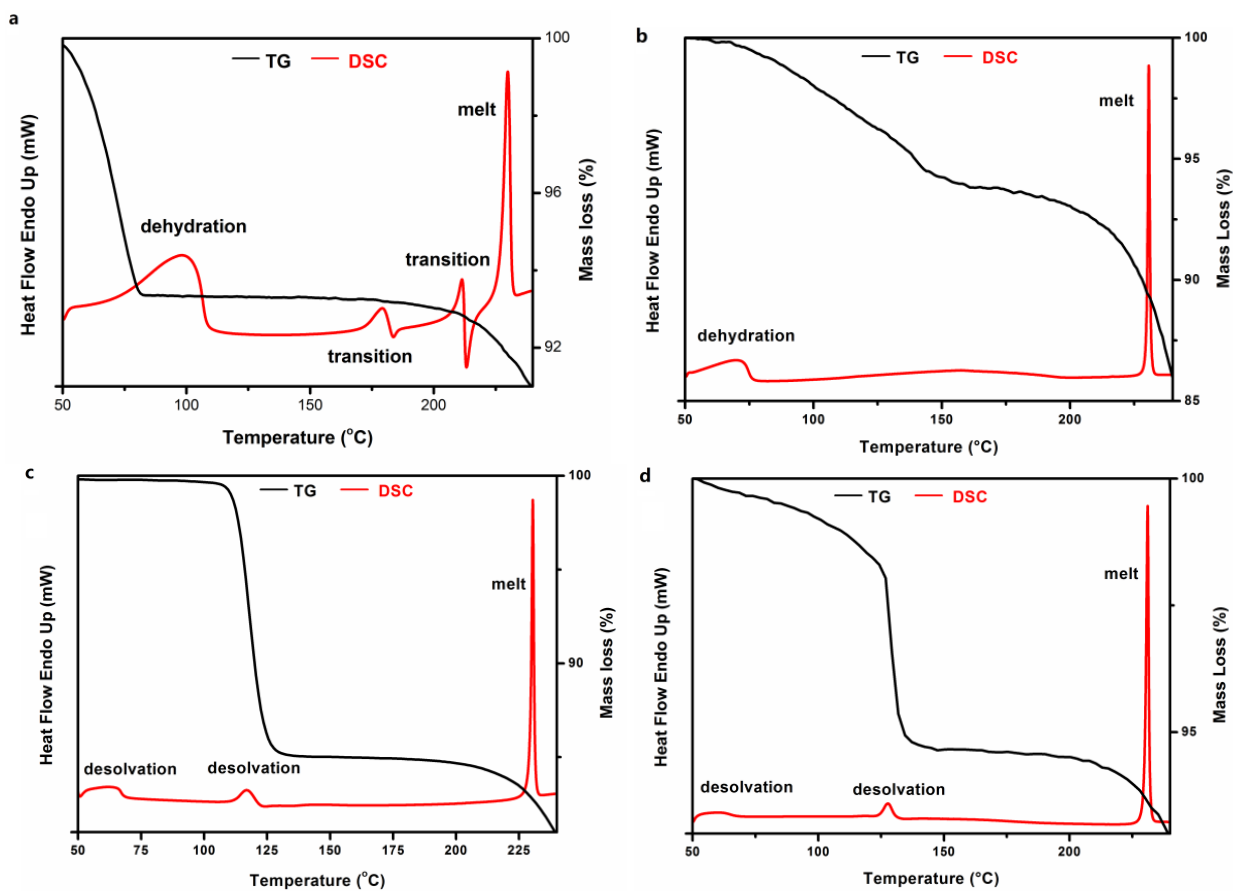

**Fig. S9** DSC and TGA profiles of Huperzine A (a) form H1, (b) form H2, (c) form S1, (d) form S3

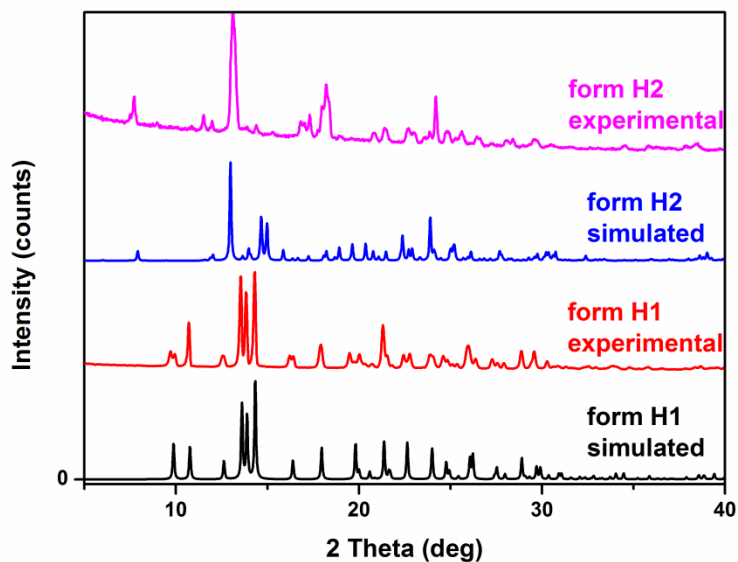

**Fig. S10** Compared simulated and experimental XRPD patterns of Huperzine A hydrates

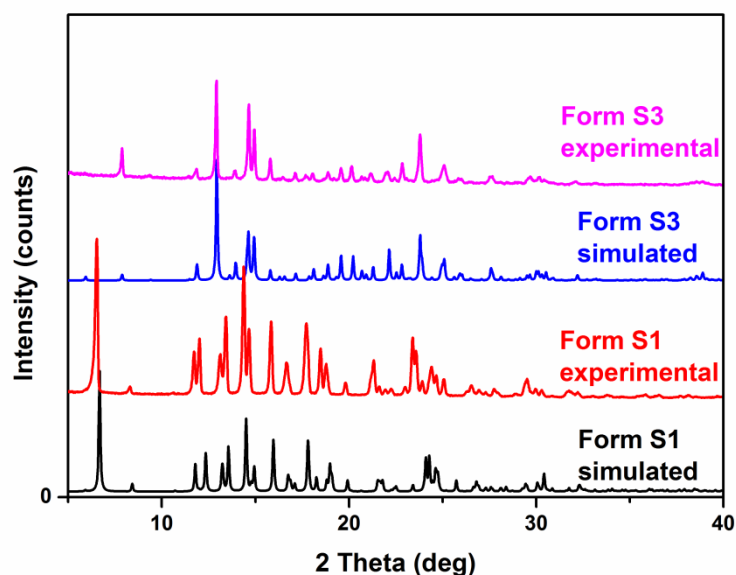

**Fig. S11** Compared simulated and experimental XRPD patterns of Huperzine A solvates

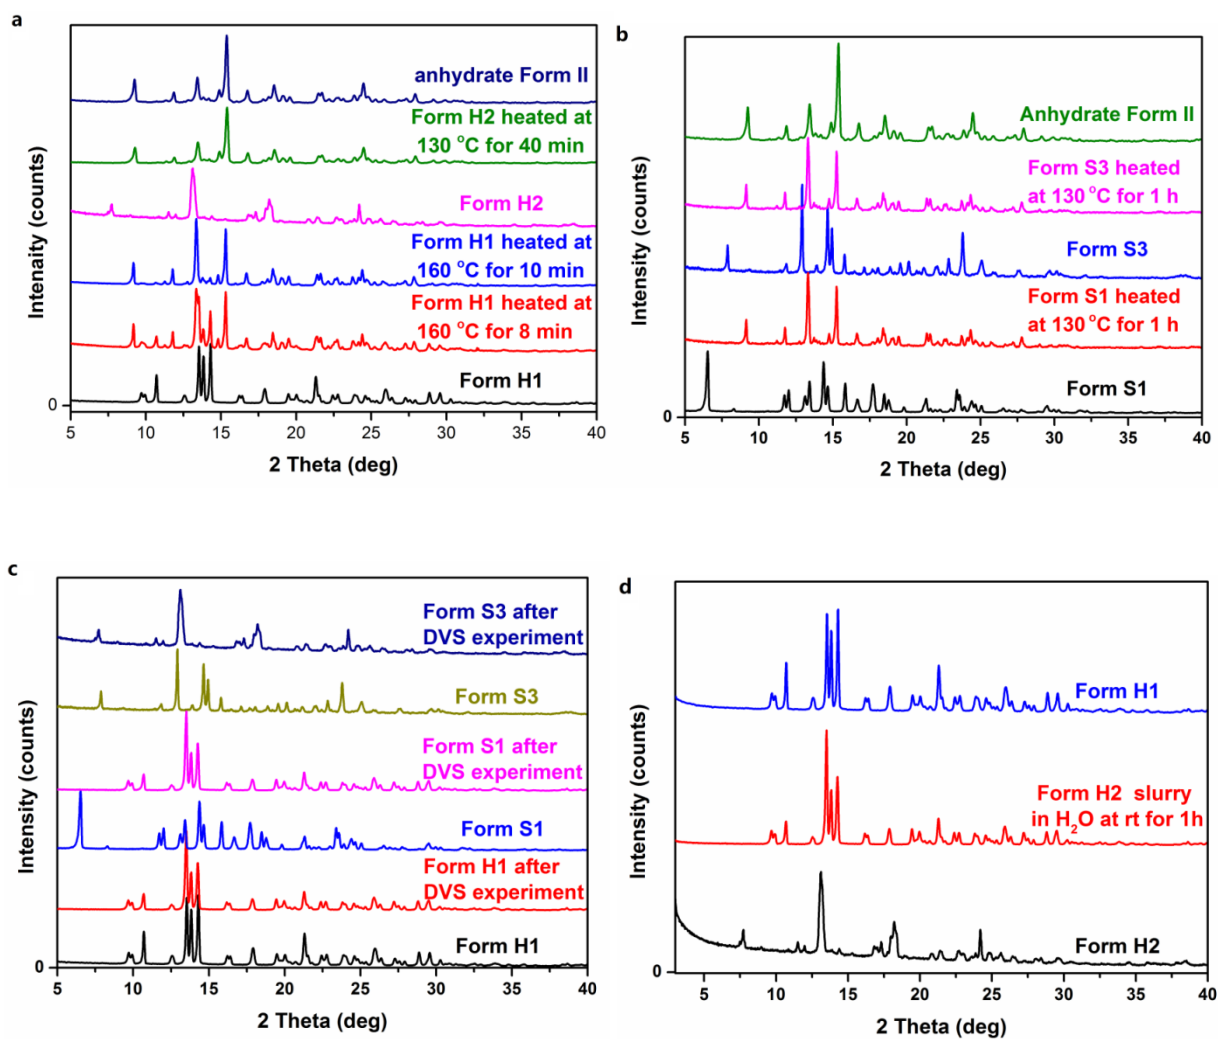

**Fig. S12** Compared XRPD patterns of huperzine A solvates after heating or DVS experiments
